# Supplementary material for: The Prevalence and Determinants of Vitamin D Status in Community-Dwelling Older Adults: Results from the English Longitudinal Study of Ageing (ELSA)
Source: PubMed Central journal article supplement (PMC6627050; doi:10.3390/nu11061253), 2019-06-01
Supplement: nutrients-11-01253-s001.pdf [file nutrients-11-01253-s001.pdf]

**Table 1.** Participant characteristics stratified by vitamin D deficiency (IOM and ES).

|                                       | Overall ( <i>n</i> = 6004) | <30 nmol/L ( <i>n</i> = 1423) | <50 nmol/L ( <i>n</i> = 3317) |
|---------------------------------------|----------------------------|-------------------------------|-------------------------------|
|                                       | N (%) ± SD                 | N (%) ± SD                    | N (%) ± SD                    |
| <b>Socio-demographic factors</b>      |                            |                               |                               |
| <b>Age, years</b>                     | 66.4 ± 8.8                 | 66.4 ± 9.5                    | 66.3 ± 9.1                    |
| 50–59                                 | 1476 (24.6)                | 399 (28.0) ***                | 865 (26.1) **                 |
| 60–69                                 | 2463 (41.0)                | 528 (37.1) ***                | 1305 (39.3) **                |
| 70–79                                 | 1553 (25.9)                | 335 (23.5) *                  | 830 (25.0)                    |
| 80+                                   | 512 (8.5)                  | 161 (11.3) ***                | 317 (9.6) ***                 |
| <b>Female</b>                         | 3291 (54.8)                | 832 (58.5) **                 | 1855 (55.9)                   |
| <b>Education ≥ O-level</b>            | 4392 (73.2%)               | 979 (68.8) ***                | 2382 (71.8) **                |
| No qualification                      | 1340 (22.4)                | 383 (26.9) ***                | 554 (20.6) **                 |
| <b>Marital Status</b>                 |                            |                               |                               |
| <sup>a</sup> Married                  | 3997 (66.6)                | 830 (58.3) ***                | 1925 (71.6) ***               |
| Single                                | 320 (5.3)                  | 96 (6.8) **                   | 121 (4.5) **                  |
| Widow                                 | 763 (12.7)                 | 240 (16.9) ***                | 283 (10.5) ***                |
| <b>Health and Lifestyle factors</b>   |                            |                               |                               |
| <b>BMI kg/m<sup>2</sup></b>           | 28.0 ± 4.9                 | 28.9 ± 5.6 ***                | 27.2 ± 4.4 ***                |
| Underweight                           | 50 (0.9)                   | 17 (1.2)                      | 26 (0.9)                      |
| Normal                                | 1578 (27.1)                | 311 (21.9) ***                | 815 (31.2) ***                |
| Overweight                            | 2461 (42.3)                | 501 (35.2) ***                | 1180 (45.1) ***               |
| Obese                                 | 1731 (29.7)                | 521 (36.6) ***                | 595 (22.7) ***                |
| <b>Physical Activity</b>              |                            |                               |                               |
| Vigorous (>1/wk)                      | 1359 (22.6)                | 194 (13.6) ***                | 773 (28.8) ***                |
| Moderate (>1/wk)                      | 3933 (65.6)                | 768 (53.9) ***                | 1917 (71.3) ***               |
| Mild (>1/wk)                          | 4975 (82.9)                | 1114 (78.3) ***               | 2285 (85.0) ***               |
| <b>Current smoker</b>                 | 695 (11.6)                 | 267 (18.8) ***                | 213 (7.9) ***                 |
| <b>Alcohol, 5–6day/wk</b>             | 356 (5.9)                  | 62 (4.4) **                   | 188 (6.9) **                  |
| No alcohol                            | 646 (10.8)                 | 243 (17.1) ***                | 423 (12.8) ***                |
| <b>SR Health</b>                      |                            |                               |                               |
| Excellent                             | 772 (12.9)                 | 122 (8.6) ***                 | 436 (16.2) ***                |
| Very good                             | 1908 (31.8)                | 368 (25.9) ***                | 898 (33.4) **                 |
| Good                                  | 1901 (31.8)                | 442 (31.1)                    | 853 (31.7)                    |
| Fair                                  | 1062 (17.7)                | 332 (23.3) ***                | 387 (14.4) ***                |
| Poor                                  | 360 (6.0)                  | 159 (11.2) ***                | 114 (4.2) ***                 |
| <sup>b</sup> <b>Limiting illness</b>  | 1887 (31.4)                | 554 (38.9) ***                | 735 (27.4) ***                |
| <b>Polypharmacy</b>                   | 1546 (25.7)                | 436 (30.6) ***                | 932 (28.1) ***                |
| <b>Predictors of Vitamin D Status</b> |                            |                               |                               |
| <b>25(OH)D, nmol/L</b>                | 48.7 ± 23.4                | 21.3 ± 5.1                    | 31.7 ± 10.6                   |
| Winter blood                          | 3564 (59.4)                | 1009 (70.9) ***               | 1354 (50.4) ***               |
| <sup>c</sup> Sun travel               | 3457 (57.6)                | 663 (46.6) ***                | 1676 (62.4) ***               |
| VitD supp user                        | 262 (4.4)                  | 27 (10.3) ***                 | 72 (27.5) ***                 |

Notes: SD, standard deviation; kg/m<sup>2</sup>, kilograms per metre squared; SR, self-reported; winter, October to March. <sup>a</sup> includes those first time, remarried and legally recognised civil partnership. <sup>b</sup> sun holiday within the last 12 months. <sup>c</sup> If longstanding illness is limiting. Independent Student t-test and  $\chi^2$  comparison between groups defined as deficiency <30 nmol/L versus  $\geq$ 30 nmol/L and <50 nmol/L versus  $\geq$ 50 nmol/L. *P* value denoting significant levels between groups  $p < 0.05^*$ ,  $p < 0.01^{**}$ ,  $p < 0.001^{***}$ .

**Table S2.** Serum 25(OH)D status by region in England, findings from the ELSA Study (*n* = 6004). Prevalence (%) vitamin D deficiency (IOM, <30 nmol/L) and vitamin D deficiency (ES, <50 nmol/L), stratified by season <sup>a</sup> and region.

| Region        | Overall<br>( <i>n</i> = 6004) | °N<br>Latitude | Mean<br>25OHD | SD   | Vitamin D deficiency<br><30 nmol/L |                               |                              | Vitamin D deficiency<br><50 nmol/L |                               |                               |
|---------------|-------------------------------|----------------|---------------|------|------------------------------------|-------------------------------|------------------------------|------------------------------------|-------------------------------|-------------------------------|
|               |                               |                |               |      | Overall<br>N = 1423<br>(23.7%)     | Winter<br>N = 1009<br>(28.3%) | Summer<br>N = 414<br>(16.9%) | Overall<br>N = 3316<br>(55.2%)     | Winter<br>N = 2210<br>(62.0%) | Summer<br>N = 1106<br>(45.2%) |
| North East    | 375                           | 54.9           | 46.4          | 23.3 | 28.8                               | 36.4                          | 20.6                         | 61.6                               | 70.3                          | 52.2                          |
| Yorkshire & H | 656                           | 53.7           | 47.9          | 22.0 | 25.9                               | 28.9                          | 14.8                         | 56.3                               | 60.3                          | 48.7                          |
| North West    | 661                           | 53.6           | 47.5          | 23.9 | 25.9                               | 29.4                          | 20.3                         | 60.2                               | 66.4                          | 51.3                          |
| East Midlands | 658                           | 52.8           | 48.1          | 23.0 | 24.9                               | 30.5                          | 17.6                         | 54.6                               | 62.0                          | 44.7                          |
| West Midlands | 655                           | 52.5           | 45.4          | 24.9 | 29.8                               | 24.5                          | 21.3                         | 61.2                               | 68.1                          | 48.9                          |
| East England  | 723                           | 52.2           | 50.6          | 23.7 | 29.6                               | 31.3                          | 16.4                         | 52.0                               | 56.5                          | 45.6                          |
| London        | 483                           | 51.5           | 45.6          | 23.7 | 29.6                               | 31.3                          | 26.4                         | 62.1                               | 65.9                          | 54.6                          |
| South East    | 1047                          | 51.1           | 52.3          | 23.5 | 17.9                               | 21.2                          | 13.8                         | 48.9                               | 56.0                          | 39.7                          |
| South West    | 746                           | 50.4           | 50.6          | 22.1 | 19.6                               | 26.6                          | 10.3                         | 49.6                               | 60.7                          | 34.9                          |

Notes: <sup>a</sup>Season defined by vitamin D calendar; summer April-October.

**Table S3.** Weighted logistic regression for predictors of vitamin D deficiency (<50 nmol/L) in ELSA study participants (*n* = 6004).

| Demographic variables                          | Unadjusted Model 2 |              | Adjusted Model 2 |              |
|------------------------------------------------|--------------------|--------------|------------------|--------------|
|                                                | OR                 | (95% CI)     | OR               | (95% CI)     |
| <b>Female</b>                                  | 1.06               | (0.93, 1.20) | 1.08             | (0.78, 1.24) |
| <b>Age 50–59</b>                               |                    | 1            |                  | 1            |
| 60–69                                          | 0.76***            | (0.65, 0.88) | 0.94             | (0.78, 1.12) |
| 70–79                                          | 0.82*              | (0.69, 0.96) | 1.03             | (0.83, 1.29) |
| 80+                                            | 1.28*              | (1.00, 1.64) | 1.67***          | (1.23, 2.28) |
| <b>Non-white ethnicity</b>                     | 4.38***            | (2.57, 7.44) | 4.67***          | (2.57, 8.51) |
| <b>Marital Status—Married</b>                  | 0.72***            | (0.63, 0.81) | 0.89             | (0.78, 1.04) |
| Widow                                          | 1.46***            | (1.22, 1.74) | 1.27*            | (1.01, 1.60) |
| Single                                         | 1.39**             | (1.08, 1.81) | 1.29             | (0.94, 1.77) |
| <b>Retired</b>                                 | 0.78***            | (0.69, 0.89) | 0.73***          | (0.63, 0.86) |
| <b>Education—O-level min.</b>                  | 1.22**             | (1.06, 1.41) | 0.93             | (0.79, 1.09) |
| <b>Region- North</b>                           |                    | 1            |                  | 1            |
| Midlands                                       | 0.84*              | (0.72, 0.98) | 0.83*            | (0.69, 0.97) |
| South                                          | 0.81**             | (0.69, 0.94) | 0.79**           | (0.66, 0.93) |
| <b><sup>a</sup>Latitude (°N)</b>               | 1.09***            | (1.04, 1.15) | 1.09***          | (1.04, 1.15) |
| <b>Modifiable Health and Lifestyle factors</b> |                    |              |                  |              |
| <b>BMI- normal</b>                             | 0.68***            | (0.59, 0.79) | 0.81**           | (0.69, 0.96) |
| obese                                          | 1.78***            | (1.54, 2.05) | 1.53***          | (1.30, 1.79) |
| <b>Alcohol intake 5–6 week</b>                 | 0.72**             | (0.56, 0.94) | 0.98             | (0.75, 1.28) |
| 3–4week                                        | 0.65***            | (0.55, 0.78) | 0.77**           | (0.64, 0.95) |
| <b>Current smoker</b>                          | 1.97***            | (1.59, 2.42) | 1.8***           | (1.45, 2.25) |
| <b>SR Health—Excellent</b>                     |                    | 1            |                  | 1            |
| Very good                                      | 1.36**             | (1.09, 1.68) | 1.21             | (0.97, 1.52) |
| Good                                           | 1.59***            | (1.29, 1.96) | 1.29*            | (1.02, 1.62) |
| Fair                                           | 2.24***            | (1.78, 2.82) | 1.59***          | (1.23, 2.05) |
| Poor                                           | 2.48***            | (1.79, 3.43) | 1.55*            | (1.09, 2.23) |
| <b>VitD supplement use</b>                     | 0.32***            | (0.23, 0.43) | 0.24***          | (0.18, 0.33) |
| <b>Sun travel</b>                              | 0.66***            | (0.58, 0.75) | 0.86*            | (0.75, 0.99) |
| <b>Season (summer)</b>                         | 0.51***            | (0.45, 0.58) | 0.47***          | (0.41, 0.54) |
| <b>PA—Vigorous (&gt;1/wk)</b>                  | 0.54***            | (0.46, 0.63) | 0.69***          | (0.59, 0.83) |
| Moderate (>1/wk)                               | 0.62***            | (0.55, 0.71) | 0.86             | (0.74, 1.01) |

Notes: OR, odds ratios; CI, confidence interval; SR, self-reported; PA, physical activity. For the adjusted model, variables included socio-demographics (age in years, gender, and region of residence), health-related behaviours (current smoker, vitamin D supplement use), physical factors (vigorous PA >1/week, BMI), and season (winter/summer blood sampling). All variables were included and assessed using the same categorisation/groupings, for visual presentation only categories that reached statistical significance are shown. <sup>a</sup> Replaced region in the adjusted model. *P* value denoting significant levels between groups  $p < 0.05^*$ ,  $p < 0.01^{**}$ ,  $p < 0.001^{***}$ .

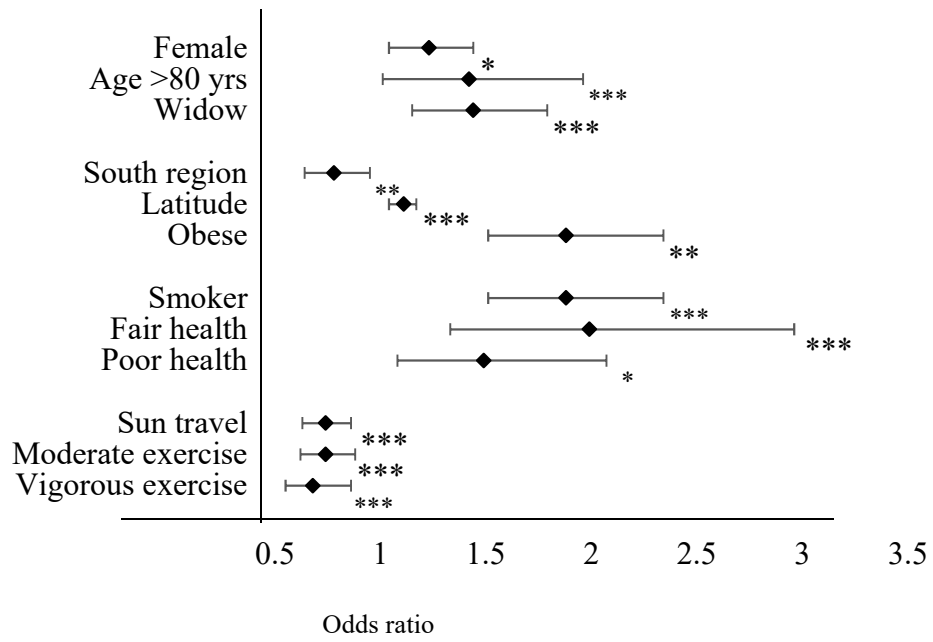

**Figure 1.** Weighted logistic regression for selected predictors of vitamin D deficiency (IOM <30 nmol/L) in ELSA study participants. *P*-value denoting significant levels between groups  $p < 0.05$  \*,  $p < 0.01$  \*\*,  $p < 0.001$  \*\*\*.
